# Supplementary material
Source: HighWire-hosted journal article supplement (http://www.qdcxjkg.com/highwire/filestream/113724/field_highwire_adjunct_files/2/Table_S2_coding.pdf)
Supplement: Table_S2_coding.pdf [file Table_S2_coding.pdf]

## Supplementary table S2. Coding Schema Applied to Explanations for Racial and Ethnic Difference Provided in Articles

### **Inherent difference**

racial factor  
ethnic factor  
genetic  
inherited factor  
constitutional  
intrinsic  
inherent features  
physical make-up  
biological  
“true” physiological

### **Anthropometric difference**

body build/size/surface/composition  
body habitus/configurations  
frame size  
physical build  
height/stature  
weight  
lung, chest, thoracic, ribcage size,  
capacity, and shape  
chest dimensions  
lung volume  
fat-free mass  
abdominal adiposity  
leg-trunk ratio/sitting-standing height  
sitting height  
chest expansion  
physical variables and characteristics  
anatomic difference  
Quetelet’s index  
posture  
body mass index  
anatomic

### **Environmental and social factors**

Infection  
environmental toxins  
bronchitis  
nutrition  
respiratory disease  
occupational exposure

pollution  
geographic/regional variation  
climate  
tobacco smoke/cigarette smoking  
altitude  
latitude  
occupational habits  
diet  
ecology  
exogenous factors  
allergy  
social economic status  
socio-economic deprivation  
education  
socio/cultural factors  
crowded living conditions  
social experience  
poverty index  
psychosocial  
physical activity  
fitness/athletic training  
exercise  
habits  
sedentary habits

### **Mechanical**

elastic recoil  
basal airway closure  
airway resistance  
compliance of chest wall  
respiratory muscle strength/power

### **Technical**

methodological issues  
selection of subjects  
values chosen for reference  
equipment variability  
technician error  
testing conditions  
healthy worker effect  
inadequate adjustment

**Other**

increased alveoli

growth hormone

age

low metabolism

developmental/physiological/altitude

adaptations

low birth weight

day to day short terms changes

growth velocity

intelligence

parenchymal lung development

**No Explanation**

no independent explanation provided

no explanation by citation of other

sources provided
